# Supplementary material
Source: Springer Nature journal article supplement (https://www.springermedizin.de/resource/supplementary/12891_2014_2144_MOESM1_ESM.pdf/9509474)
Supplement: MOESM1 [file 9509474]

**Low back pain, M54**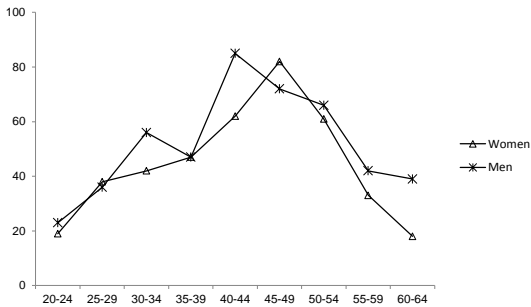**Disc disorders, M51**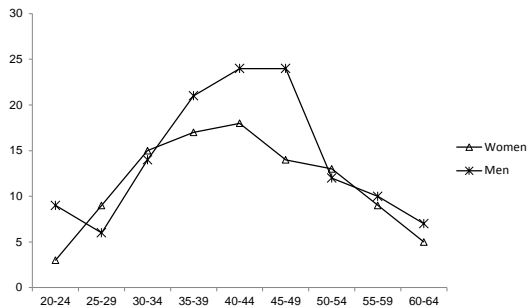**Knee Osteoarthritis, M17**

Number of sick leave periods

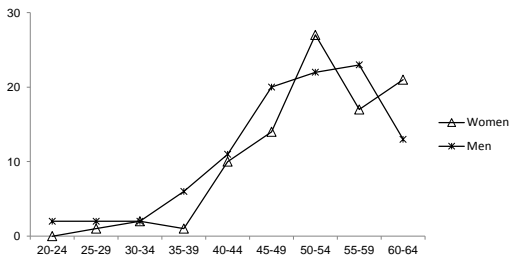**Hip osteoarthritis, M16**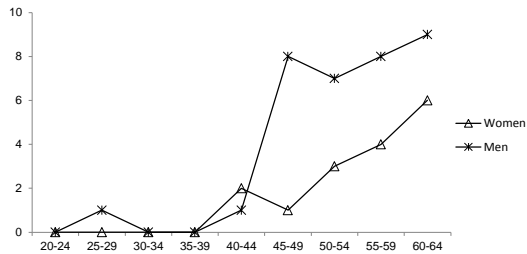**Rheumatoid arthritis, M05-M06**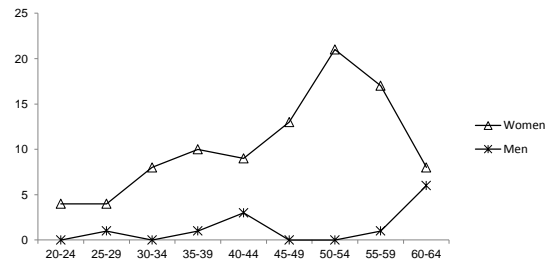**Myalgia, M79**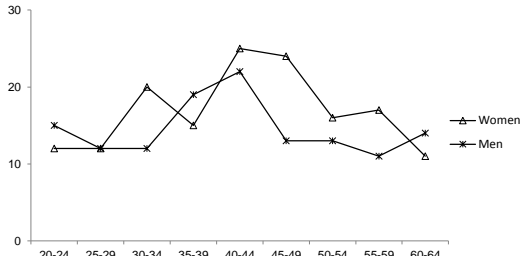

Age at the start of the sick leave period
